# Supplementary material for: In Vitro Anti-Inflammatory Activity of Essential Oil and β-Bisabolol Derived from Cotton Gin Trash
Source: MDPI journal article supplement (doi:10.3390/molecules27020526), 2022-01-14
Supplement: s1 [file s1]

# In Vitro Anti-Inflammatory Activity of Essential Oil and $\beta$ -Bisabolol Derived from Cotton Gin Trash

Mary A. Egbuta <sup>1</sup>, Shane McIntosh <sup>1</sup>, Daniel L. E. Waters <sup>1</sup>, Tony Vancov <sup>2</sup> and Lei Liu <sup>1,\*</sup>

<sup>1</sup> Southern Cross Plant Science, Faculty of Science and Engineering, Southern Cross University, Lismore, NSW 2480, Australia; Mary.Egbuta@scu.edu.au (M.A.E.); Shane.McIntosh@scu.edu.au (S.M.); daniel.waters@scu.edu.au (D.L.E.W.)

<sup>2</sup> Elizabeth Macarthur Agricultural Institute, NSW Department of Planning, Industry & Environment, DPI Agriculture, Woodbridge Rd, Menangle, NSW 2568, Australia; tony.vancov@dpi.nsw.gov.au

\* Correspondence: ben.liu@scu.edu.au; Tel.: +61-02-6620-3293

**Supplementary Table S1.** Percentage abundance of volatiles identified in hydro-distilled pesticide-free CGT extracts.

| Volatile compounds                      | % abundance |
|-----------------------------------------|-------------|
| $\alpha$ -pinene                        | 1.27        |
| myrcene                                 | 1.13        |
| $\beta$ -ocimene                        | 3.91        |
| N-methylpyrrole                         | 0.33        |
| $\gamma$ -terpineol                     | 0.02        |
| $\alpha$ -copaene                       | 1.16        |
| $\alpha$ -cuprenene                     | 4.08        |
| $\alpha$ -santalene                     | 0.32        |
| caryophyllene(E-)                       | 6.81        |
| epi- $\beta$ -santalene                 | 0.33        |
| $\beta$ -santalene                      | 1.95        |
| $\alpha$ -umulene                       | 4.08        |
| $\gamma$ -curcumene                     | 0.29        |
| ar-curcumene                            | 0.15        |
| $\beta$ -copaene                        | 0.15        |
| sesquisabinene                          | 1.09        |
| 3-ethyl-4-methyl-5-(methylthio)isothiaz | 0.23        |
| $\beta$ -bisabolene                     | 0.60        |
| 1-ethyl-2,3-dimethyl-benzene            | 7.26        |
| (Z)- $\gamma$ -Bisabolene               | 8.68        |
| 1H-Cyclopenta[1,3]- $\beta$ -cubebene   | 0.92        |
| 2,4-dimethyl-quinoline                  | 1.76        |
| bicyclo[4.1.0]hept-3-carene             | 7.94        |
| 2,3,6,7,8,8a-he-1H-3a,7-methanoazulene  | 1.68        |
| dodecanoic acid                         | 0.23        |
| 2,6-bis(1,1-dimethylethyl)-4-me-phenol  | 0.18        |
| 1,2,4,5-tetramethyl-benzene             | 0.63        |
| nerolidol                               | 0.75        |

|                                                      |       |
|------------------------------------------------------|-------|
| 3,4,4-trimethyl-2-cyclohexen-1-one                   | 0.29  |
| 2-ethyl-1,4-dimethyl-benzene                         | 0.13  |
| vulgarol B                                           | 0.31  |
| 1-(2-aminophenyl)-1-(4-pyridyl)ethane                | 0.29  |
| 1-naphthalenyl-thiourea                              | 0.14  |
| caryophyllenyl alcohol                               | 0.23  |
| 1-methylene-3-cyclohexane                            | 0.68  |
| 2-Hydroxyfluoranthene                                | 0.21  |
| caryophyllene oxide                                  | 4.65  |
| 2,3-dimethyl-thiophene                               | 0.07  |
| $\alpha$ -himachalene                                | 0.23  |
| trans-3,4-dimethyl-1-cyclohexenecarbal               | 0.25  |
| gossonorol                                           | 3.24  |
| 1-(hydroxymethyl)-2-vinyl-2-isopropylcy              | 4.10  |
| 4-cyclohexyl-benzenamine                             | 0.18  |
| $\beta$ -bisabolol                                   | 23.50 |
| isocamphane                                          | 0.43  |
| italicene                                            | 0.68  |
| 1,2,4,5-tetramethyl-benzene,                         | 0.12  |
| 1,3,5-bisabolatrien-7-ol                             | 0.09  |
| tetradecanoic acid                                   | 0.12  |
| 4-oxotricyclo[3.3.1.1 <sup>3</sup> ]-thiocyanic acid | 0.17  |
| cadina-4,10(15)-dien-3-one                           | 0.04  |
| 5-hydroxy-cis-calamenene                             | 0.54  |
| 6,10,14-trimethyl-2-pentadecanone                    | 0.17  |
| 2H-isoindole                                         | 0.11  |
| n-pentadecanol                                       | 0.10  |
| 9-bromo-9-methyl-bicyclo[6.1.0]nonane                | 0.02  |
| 5-methyl- 1,3,6-heptatriene                          | 0.02  |
| 5Z,9E-farnesyl acetone                               | 0.09  |
| 1-nonadecene                                         | 0.20  |
| n-hexadecanoic acid                                  | 0.29  |
| 2Z,6Z-farnesol                                       | 0.39  |
